# Supplementary material for: Beneficial Effects of Trillium govanianum Rhizomes in Pain and Inflammation
Source: PubMed Central journal article supplement (PMC6274187; doi:10.3390/molecules21081095), 2016-08-20
Supplement: molecules-21-01095-s001.pdf [file molecules-21-01095-s001.pdf]

## Supplementary Materials: Beneficial Effects of *Trillium govonianum* Rhizomes in Pain and Inflammation

Shafiq Ur Rahman, Achyut Adhikari, Muhammad Ismail, Muhammad Raza Shah, Muhammad Khurram, Muhammad Shahid, Farman Ali, Abdul Haseeb, Fazal Akbar and Marcello Iriti

**Table S1.** Antinociceptive effect of *T. govonianum* rhizome MeOH-ext and its fractions in tonic-visceral chemically-induced nociception.

| Sample     | Dose (mg/kg) | Number of Writhes |
|------------|--------------|-------------------|
| Saline     | 10 mL/kg     | 29.50 ± 2.50      |
| Diclofenac | 50           | 4.50 ± 2.50 ***   |
| n-Hex-fr   | 50           | 7.50 ± 4.50 **    |
|            | 100          | 5.50 ± 3.50 ***   |
| CHL-fr     | 50           | 8.00 ± 1.00 **    |
|            | 100          | 14.50 ± 1.50 *    |
| EtOAc-fr   | 50           | 10.50 ± 3.50 **   |
|            | 100          | 7.00 ± 4.00 **    |
| BuOH-fr    | 50           | 5.00 ± 4.00 ***   |
|            | 100          | 12.50 ± 4.50 *    |
| Aq-fr      | 50           | 6.50 ± 3.50 ***   |
|            | 100          | 4.00 ± 1.00 ***   |
| MeOH-Ext   | 50           | 6.50 ± 1.50 ***   |
|            | 100          | 7.50 ± 0.50 **    |

Values expressed as mean ± SEM. ANOVA followed by Dunnett's post hoc test. \*  $p < 0.05$ , \*\*  $p < 0.01$ , \*\*\*  $p < 0.001$  compared to saline treated group,  $n = 6$  mice per group.

**Table S2.** Antinociceptive effect of MeOH-ext of *T. govonianum* rhizome and its fractions in thermal induced nociception.

| Sample   | Dose (mg/kg) | 30 min           | 60 min           | 90 min          | 120 min         |
|----------|--------------|------------------|------------------|-----------------|-----------------|
| Saline   | 10 mL/kg     | 13.30 ± 0.40     | 13.35 ± 0.55     | 13.00 ± 1.00    | 13.65 ± 0.35    |
| Tramadol | 30           | 29.00 ± 1.00 *** | 28.30 ± 1.70 *** | 28.40 ± 1.40 *  | 26.00 ± 1.00 ** |
| Hex-fr   | 50           | 23.40 ± 0.70 *   | 25.60 ± 2.30 **  | 29.00 ± 1.00 ** | 26.40 ± 2.10 ** |
|          | 100          | 25.35 ± 0.85 **  | 25.85 ± 1.05 *** | 29.75 ± 0.25 ** | 25.35 ± 1.65 ** |
| Chl-fr   | 50           | 17.25 ± 1.55     | 21.40 ± 1.40 *   | 22.65 ± 2.05 *  | 20.35 ± 0.45 *  |
|          | 100          | 20.35 ± 2.15 *   | 19.30 ± 0.10     | 16.90 ± 2.80    | 19.05 ± 1.95    |
| EtOAc-fr | 50           | 17.55 ± 0.95     | 24.35 ± 2.65 **  | 24.25 ± 1.15 *  | 23.90 ± 3.30 *  |
|          | 100          | 22.20 ± 0.10 *   | 23.05 ± 0.95 **  | 23.75 ± 0.65 *  | 25.60 ± 2.50 ** |
| BuOH-fr  | 50           | 13.75 ± 1.95     | 18.15 ± 0.65     | 18.25 ± 4.45    | 18.25 ± 0.05    |
|          | 100          | 27.50 ± 1.30 **  | 23.45 ± 0.55 **  | 25.80 ± 4.20 *  | 25.45 ± 2.55 ** |
| Aq-fr    | 50           | 24.60 ± 3.20 **  | 25.60 ± 2.80 **  | 23.65 ± 0.65 *  | 25.00 ± 0.10 ** |
|          | 100          | 24.80 ± 2.00 **  | 27.10 ± 2.90 *** | 25.80 ± 1.40 *  | 24.25 ± 1.35 ** |
| MeOH-Ext | 50           | 18.75 ± 3.95 *   | 23.90 ± 0.10 **  | 18.45 ± 0.55    | 16.75 ± 1.05    |
|          | 100          | 21.35 ± 2.55 *   | 25.20 ± 1.20 **  | 26.60 ± 3.40 ** | 22.90 ± 2.70 *  |

Values expressed as mean ± SEM. ANOVA followed by Dunnett's post hoc test. \*  $p < 0.05$ , \*\*  $p < 0.01$ , \*\*\*  $p < 0.001$  compared to saline treated group,  $n = 6$ .
